# Supplementary material for: Application of copper(II)-based chemicals induces CH3Br and CH3Cl emissions from soil and seawater
Source: PubMed Central journal article supplement (PMC8748922; doi:10.1038/s41467-021-27779-3), 2022-01-10
Supplement: 41467_2021_27779_MOESM1_ESM.pdf [file 41467_2021_27779_MOESM1_ESM.pdf]

Supplementary Information for

## **Application of copper(II)-based chemicals induces CH<sub>3</sub>Br and CH<sub>3</sub>Cl emissions from soil and seawater**

Yi Jiao<sup>1,4,\*</sup>, Wanying Zhang<sup>2</sup>, Jae Yun Robin Kim<sup>1</sup>, Malte Julian Deventer<sup>1,5</sup>, Julien  
Vollering<sup>1,6</sup>, and Robert C. Rhew<sup>1,3,\*</sup>

1. Department of Geography, University of California, Berkeley, California, 94720, USA

2. Anhui Province Key Laboratory of Polar Environment and Global Change, School of Earth  
and Space Sciences, University of Science and Technology of China, Hefei, 230026, China

3. Department of Environmental Science, Policy and Management, University of California,  
Berkeley, California, 94720, USA

4. Present address: Terrestrial Ecology Section, Department of Biology, University of  
Copenhagen, Universitetsparken 15, Copenhagen Ø, DK-2100, Denmark

5. Present address: ANECO Institut für Umweltschutz GmbH & Co., Hamburg, 21079,  
Germany

6. Present address: Department of Environmental Sciences, Western Norway University of  
Applied Sciences, 5020 Bergen, Norway

\* Correspondence should be addressed to Y.J. ([yi.jiao@bio.ku.dk](mailto:yi.jiao@bio.ku.dk)) or R.C.R.  
([rrhew@berkeley.edu](mailto:rrhew@berkeley.edu))

## Table of content

### Five figures –

**Supplementary Fig. 1** CH<sub>3</sub>Br and CH<sub>3</sub>Cl fluxes from experiment IV

**Supplementary Fig. 2** Photographs of the chemical mixtures after 2 hours of reaction in experiment IV

**Supplementary Fig. 3** CH<sub>3</sub>Cl fluxes from experiment V

**Supplementary Fig. 4** A representative photograph of the mineral soil and autoclaved soil used in this study

**Supplementary Fig. 5** Presumed degradation pathway of catechol by Fenton-like or photo-Fenton reactions based upon this study and literature

### Four tables –

**Supplementary Table 1** Soil biogeochemical properties at the Oxford Tract

**Supplementary Table 2** Temperature, UVA, UVB, and photosynthetic active radiation (PAR) intensities during the light experiment III

**Supplementary Table 3** Temperature, UVA, UVB, and photosynthetic active radiation (PAR) intensities during the light experiment IV

**Supplementary Table 4** Other possible products detected in experiment IV

### One note –

**Supplementary Note 1** A simplified calculation on CH<sub>3</sub>Br and CH<sub>3</sub>Cl emissions with respect to the global agricultural application of copper(II) sulfate

### Supplementary References

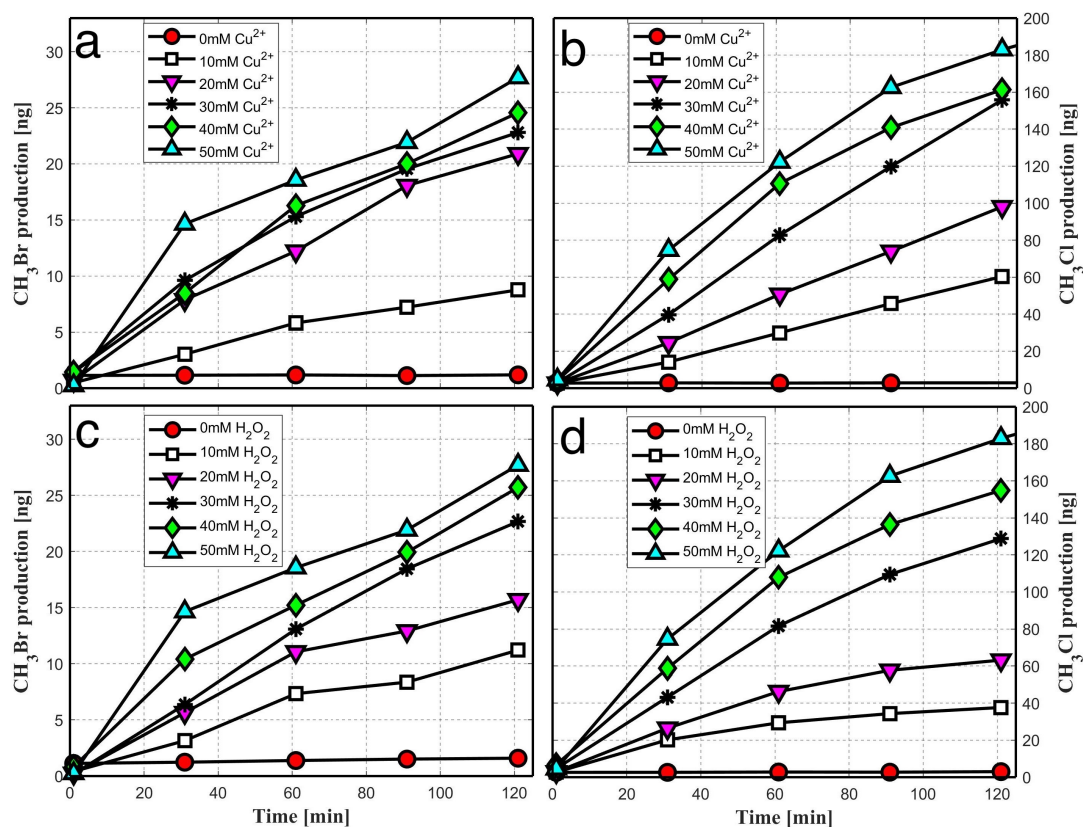

**Supplementary Fig. 1** Methyl bromide ( $\text{CH}_3\text{Br}$ ) and methyl chloride ( $\text{CH}_3\text{Cl}$ ) production over time from different chemical mixtures: **(a)** 10 ml each of 10 mM catechol, 20 mM KBr, 50 mM  $\text{H}_2\text{O}_2$ , and  $\text{CuSO}_4$  at concentrations of 0 mM, 10 mM, 20 mM, 30 mM, 40 mM and 50 mM; **(b)** 10 ml each of 10 mM catechol, 20 mM KCl, 50 mM  $\text{H}_2\text{O}_2$ , and  $\text{CuSO}_4$  at concentrations of 0 mM, 10 mM, 20 mM, 30 mM, 40 mM and 50 mM; **(c)** 10 ml each of 10 mM catechol, 20 mM KBr, 50 mM  $\text{CuSO}_4$ , and  $\text{H}_2\text{O}_2$  at concentrations of 0 mM, 10 mM, 20 mM, 30 mM, 40 mM and 50 mM; **(d)** 10 ml each of 10 mM catechol, 20 mM KCl, 50 mM  $\text{CuSO}_4$ , and  $\text{H}_2\text{O}_2$  at concentrations of 0 mM, 10 mM, 20 mM, 30 mM, 40 mM and 50 mM. The figure showed the average values of two replicative measurements for each treatment ( $n = 2$ ). The individual fluxes is accessible in “Data availability” in the main text.

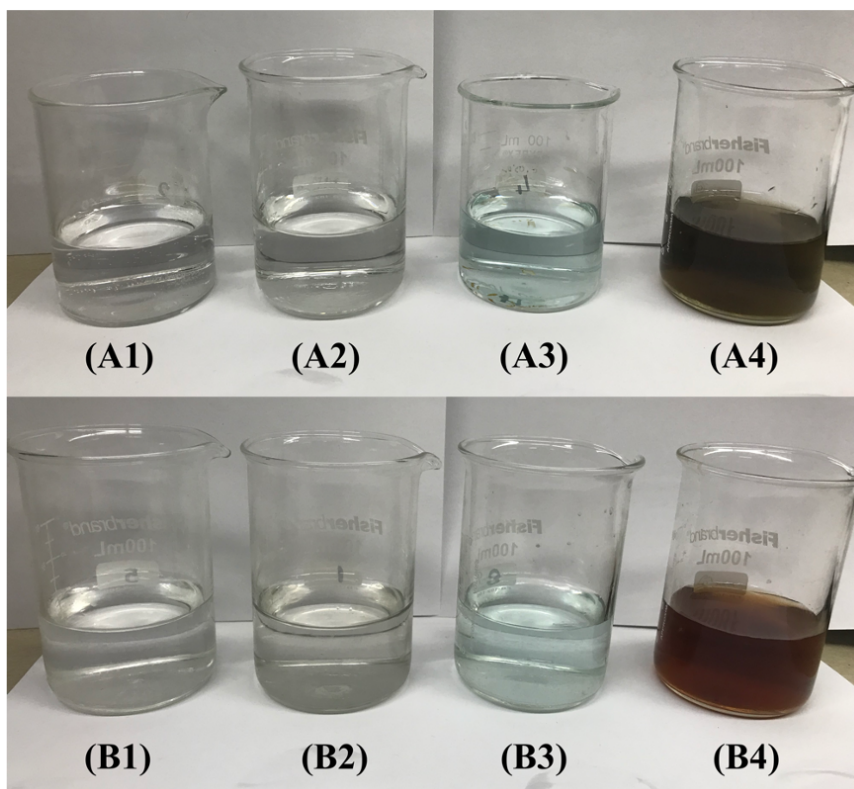

**Supplementary Fig. 2** Photographs of the chemical mixtures after ~2 hours of reaction at 20° C. The configurations of the chemical mixtures were: **(A1)** 10 ml 10 mM catechol (benzene-1,2-diol), 10 ml 20 mM KCl, 20 ml H<sub>2</sub>O; **(A2)** 10 ml 10 mM catechol, 10 ml 20 mM KCl, 10 ml 50 mM H<sub>2</sub>O<sub>2</sub>, 10 ml H<sub>2</sub>O; **(A3)** 10 ml 10 mM catechol, 10 ml 20 mM KCl, 10 ml 50 mM CuSO<sub>4</sub>, 10 ml H<sub>2</sub>O; **(A4)** 10 ml 10 mM catechol, 10 ml 20 mM KCl, 10 ml 50 mM H<sub>2</sub>O<sub>2</sub>, 10 ml 50 mM CuSO<sub>4</sub>; **(B1)** 10 ml 10 mM catechol, 10 ml 20 mM KBr, 20 ml H<sub>2</sub>O; **(B2)** 10 ml 10 mM catechol, 10 ml 20 mM KBr, 10 ml 50 mM H<sub>2</sub>O<sub>2</sub>, 10 ml H<sub>2</sub>O; **(B3)** 10 ml 10 mM catechol, 10 ml 20 mM KBr, 10 ml 50 mM CuSO<sub>4</sub>, 10 ml H<sub>2</sub>O; **(B4)** 10 ml 10 mM catechol, 10 ml 20 mM KBr, 10 ml 50 mM H<sub>2</sub>O<sub>2</sub>, 10 ml 50 mM CuSO<sub>4</sub>.

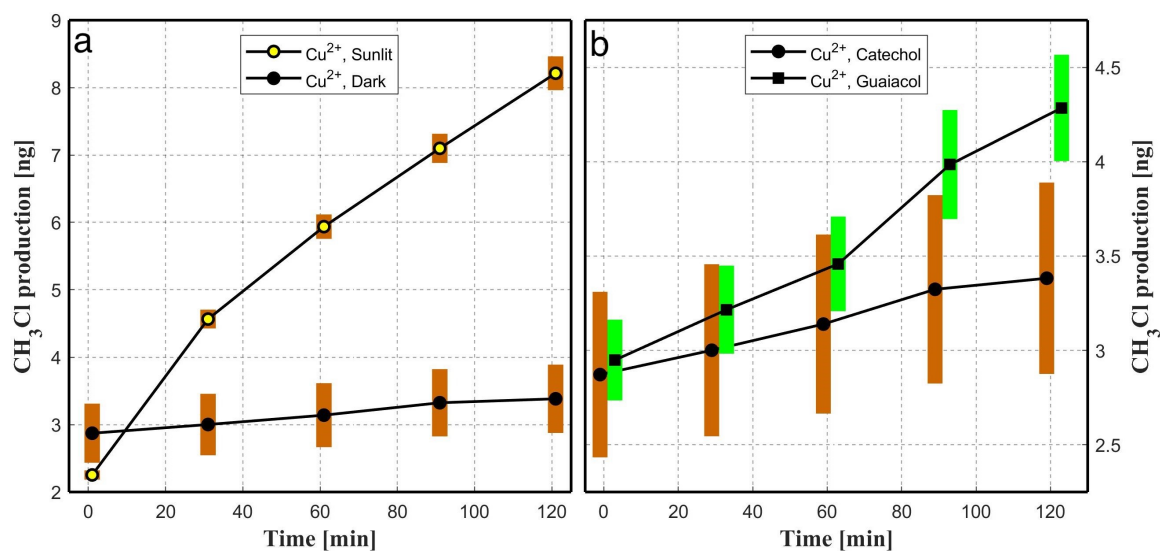

**Supplementary Fig. 3** Methyl chloride ( $\text{CH}_3\text{Cl}$ ) production over time from different chemical mixtures: (a) 10 ml each of 10 mM catechol, 20 mM KCl, and 50 mM  $\text{CuSO}_4$ , mixed and incubated under either sunlit or dark conditions; (b) 10 ml each of either 10 mM catechol or 10 mM guaiacol, and 20 mM KCl, 50 mM  $\text{CuSO}_4$ , mixed and incubated under dark conditions. The symbols represent the average values of two replicate incubations ( $n = 2$ ) and the upper and lower boundary of the bars represent the two individual fluxes.

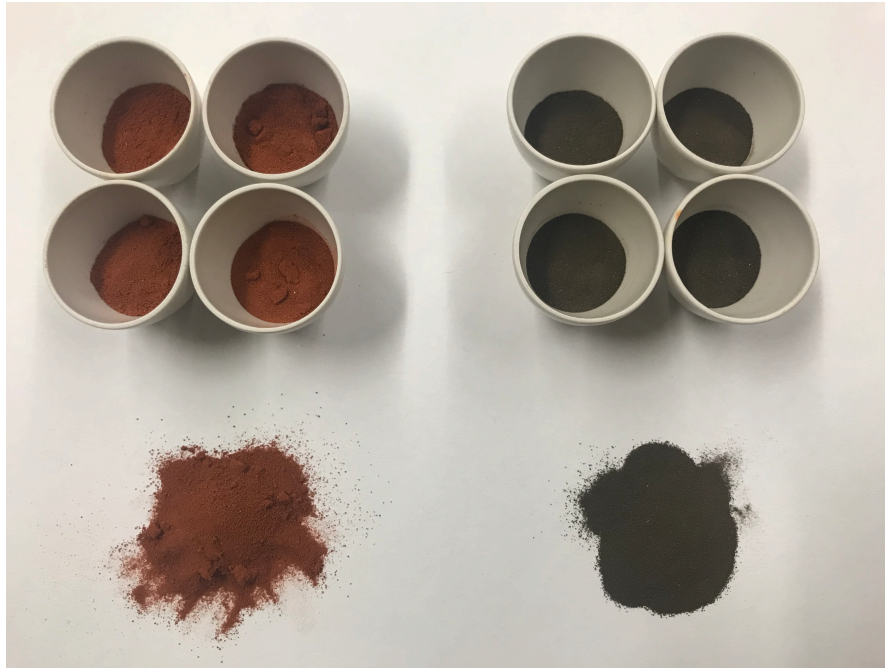

**Supplementary Fig. 4** Photograph of a representative set of mineral soil (left) and autoclaved soil (right) samples used in this study. The reddish-brown color of the mineral soil shows the depletion of organic matter after the “Loss on Ignition” combustion process, while the dark color of the autoclaved soils shows the preservation of organic matter.

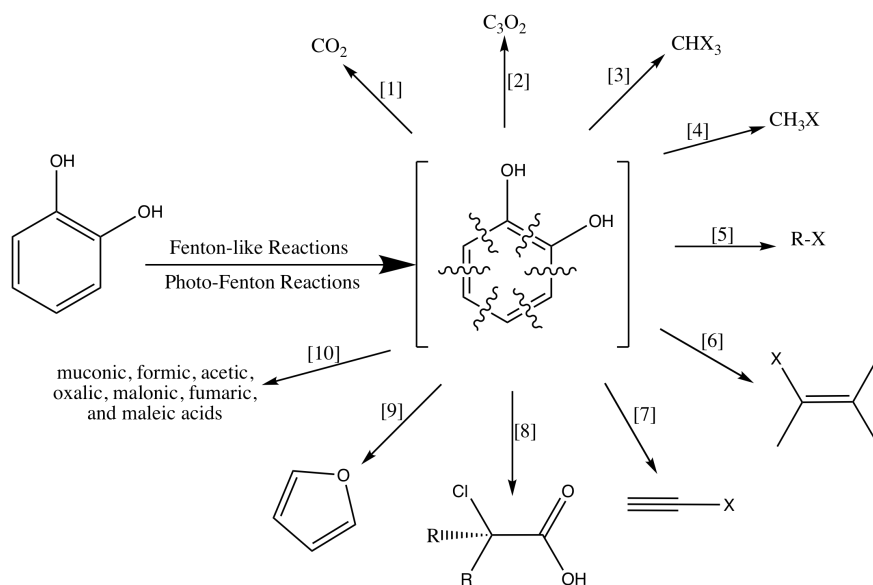

**Supplementary Fig. 5** Presumed degradation pathway of catechol by Fenton-like or Photo-Fenton reactions<sup>1</sup> to form [1] carbon dioxide<sup>2</sup>, [2] carbon suboxide<sup>3</sup>, [3] trihalomethanes<sup>4</sup>, [4] methyl halides, [5] chloroethane, idioethane and other chloroalkanes<sup>5-7</sup>, [6] chloroethene, [7] chloroethyne<sup>6</sup>, [8] chlorinated acetic acid<sup>8,9</sup>, [9] furan<sup>10,11</sup>, and [10] muonic, formic, acetic, oxalic, malonic, fumaric and maleic acids<sup>2,12-14</sup>. X represents Cl, Br or I. For the presumed pathways catalyzed by Cu(II), future experiment is needed to measure Cu(II) and Cu(I) concentrations to verify their roles during the reaction.

**Supplementary Table 1.** Soil biogeochemical properties at the Oxford Tract, including organic matter, element contents, pH, and soil texture, etc. Analyses conducted by A&L Western Agricultural Laboratories<sup>a</sup>, Modesto, California, U.S. Chloride and bromide data was from another study<sup>15</sup>, which used the soil from the same field site as this study.

| Analyte [unit]                  | Results | Analyte [unit]                 | Results   |
|---------------------------------|---------|--------------------------------|-----------|
| Organic Matter [%]              | 4.7     | Chloride Cl <sup>-</sup> [ppm] | 148 ± 71  |
| NO <sub>3</sub> -N [ppm]        | 44.5    | Bromide Br <sup>-</sup> [ppm]  | 1.1 ± 0.3 |
| Phosphorus Weak Bray [ppm]      | 149     | Iron [ppm]                     | 63        |
| NaHCO <sub>3</sub> -P [ppm]     | 74.5    | Copper [ppm]                   | 5.4       |
| Potassium K [ppm]               | 278     | CEC [meq/100g]                 | 22.7      |
| Magnesium Mg [ppm]              | 437     | Sand [%]                       | 42        |
| Calcium Ca [ppm]                | 2531.5  | Silt [%]                       | 24        |
| Sodium Na [ppm]                 | 26.5    | Clay [%]                       | 34        |
| Sulfur SO <sub>4</sub> -S [ppm] | 5.5     | Texture                        | Clay Loam |
| pH                              | 5.6     |                                |           |

<sup>a</sup> About A&L Western Agricultural Laboratories <http://www.al-labs-west.com/>



**Supplementary Table 2.** Temperature, UVA ( $\lambda = \sim 320$  to 390 nm, half-sensitivity points, resolution 5 mW m<sup>-2</sup>, Vernier UVA-BTA), UVB ( $\lambda = 265$ -322 nm, 10% sensitivity points, resolution 0.25 W m<sup>-2</sup>, Vernier UVB-BTA) and photosynthetic active radiation (PAR,  $\lambda = 410$ -655 nm, resolution 1  $\mu\text{mol m}^{-2} \text{s}^{-1}$  (1 W m<sup>-2</sup>  $\approx$  4.6  $\mu\text{mol m}^{-2} \text{s}^{-1}$ )<sup>b</sup>, absolute accuracy  $\pm 5\%$ , Vernier PAR-BTA) intensities inside the glass jar during the light treatment in experiment III (n = 3). Means and standard deviations are rounded based upon the resolution of measurements.

| Day | Temperature [°C] | UVA [mW m <sup>-2</sup> ] | UVB [mW m <sup>-2</sup> ] | PAR [ $\mu\text{mol m}^{-2} \text{s}^{-1}$ ] |
|-----|------------------|---------------------------|---------------------------|----------------------------------------------|
| 1   | 22.7 $\pm$ 0.8   | 19370 $\pm$ 420           | 96 $\pm$ 11               | 870 $\pm$ 50                                 |
| 2   | 19.5 $\pm$ 1.1   | 19540 $\pm$ 100           | 82 $\pm$ 14               | 790 $\pm$ 150                                |
| 3   | 16.3 $\pm$ 1.0   | 19330 $\pm$ 270           | 38 $\pm$ 16               | 710 $\pm$ 40                                 |
| 4   | 19.7 $\pm$ 0.5   | 19230 $\pm$ 110           | 44 $\pm$ 12               | 780 $\pm$ 110                                |
| 5   | 21.7 $\pm$ 0.7   | 19500 $\pm$ 250           | 249 $\pm$ 38              | 950 $\pm$ 90                                 |
| 6   | 26.4 $\pm$ 1.9   | 19380 $\pm$ 270           | 457 $\pm$ 34              | 1860 $\pm$ 90                                |
| 7   | 27.6 $\pm$ 0.7   | 19410 $\pm$ 50            | 506 $\pm$ 9               | 1920 $\pm$ 150                               |
| 8   | 26.1 $\pm$ 0.7   | 19360 $\pm$ 230           | 490 $\pm$ 31              | 1940 $\pm$ 80                                |
| 9   | -                | 19220 $\pm$ 180           | 600 $\pm$ 12              | 2110 $\pm$ 100                               |
| 10  | -                | 19460 $\pm$ 220           | 256 $\pm$ 39              | 1060 $\pm$ 70                                |
| 11  | -                | 19300 $\pm$ 260           | 439 $\pm$ 48              | 1690 $\pm$ 210                               |
| 12  | -                | 19420 $\pm$ 420           | 61 $\pm$ 20               | 520 $\pm$ 90                                 |
| 13  | -                | 19610 $\pm$ 260           | 358 $\pm$ 15              | 1480 $\pm$ 210                               |
| 14  | -                | 19500 $\pm$ 360           | 591 $\pm$ 42              | 1930 $\pm$ 70                                |
| 15  | -                | 19180 $\pm$ 170           | 416 $\pm$ 90              | 1340 $\pm$ 240                               |
| 16  | -                | 19220 $\pm$ 280           | 515 $\pm$ 36              | 1770 $\pm$ 120                               |
| 17  | -                | 19290 $\pm$ 210           | 410 $\pm$ 188             | 1540 $\pm$ 510                               |

<sup>b</sup> An approximation assuming a flat spectral distribution curve over 400-700 nm is 1 W m<sup>-2</sup>  $\approx$  4.6  $\mu\text{mol m}^{-2} \text{s}^{-1}$  ([https://www.licor.com/env/pdf/light/Rad\\_Meas.pdf](https://www.licor.com/env/pdf/light/Rad_Meas.pdf)).

**Supplementary Table 3.** Temperature, UVA, UVB, and PAR intensities inside and outside the glass jar during the light treatment in experiment V (n = 10). Means and standard deviations are rounded based upon the resolution of measurements.

| <b>Attribute</b> | <b>Outside</b> | <b>Inside</b> | <b>Unit</b>                             | <b>Ratio [in/out]</b> |
|------------------|----------------|---------------|-----------------------------------------|-----------------------|
| Temperature      | 23.1 ± 2.3     | 27.1 ± 1.3    | [°C]                                    | 1.17                  |
| UVA              | 19400 ± 10     | 19390 ± 10    | [mW m <sup>-2</sup> ]                   | 1.00                  |
| UVB              | 127 ± 19       | 31 ± 6        | [mW m <sup>-2</sup> ]                   | 0.24                  |
| PAR              | 1270 ± 110     | 990 ± 140     | [μmol m <sup>-2</sup> s <sup>-1</sup> ] | 0.78                  |

**Supplementary Table 4.** Other possible products detected from the mixture of 10 ml each of 10 mM catechol (benzene-1,2-diol), 20 mM KCl, 50 mM CuSO<sub>4</sub> and 50 mM H<sub>2</sub>O<sub>2</sub> after 2 hours of reaction. The soluble phase was first extracted by CH<sub>2</sub>Cl<sub>2</sub>. Measurements conducted by the University of California, Berkeley, QB3/Chemistry Mass Spectrometry Facility<sup>c</sup>.

| <b>Method</b>          | <b>products</b>                                                                            | <b>phase</b> |
|------------------------|--------------------------------------------------------------------------------------------|--------------|
| laser absorption       | CO <sub>2</sub>                                                                            | gaseous      |
| GC/MS                  | Chloroform (CHCl <sub>3</sub> )                                                            | gaseous      |
| magnet EI <sup>+</sup> | furan                                                                                      | soluble      |
| magnet EI <sup>+</sup> | tetrahydrofuran                                                                            | soluble      |
| magnet EI <sup>+</sup> | dibutyl phthalate                                                                          | soluble      |
| magnet EI <sup>+</sup> | 2-ethyl-1-hexanol                                                                          | soluble      |
| magnet EI <sup>+</sup> | 2,4-bis(1,1-dimethylethyl)-phenol                                                          | soluble      |
| magnet EI <sup>+</sup> | 1-(2-hydroxy-6-methoxyphenyl)-ethanone                                                     | soluble      |
| magnet EI <sup>+</sup> | 4'-hydroxy-2,2-dimethylpropiophenone                                                       | soluble      |
| magnet EI <sup>+</sup> | 2,2'-methylenebis[6-(1,1-dimethylethyl)4-ethyl-phenol]                                     | soluble      |
| magnet EI <sup>+</sup> | 7,9-ditert-butyl-1-oxaspiro (4,5) deca-6,9-diene-2,8-dione                                 | soluble      |
| TOF MS ES <sup>-</sup> | CuKS <sub>2</sub>                                                                          | precipitate  |
| TOF MS ES <sup>-</sup> | Cu <sub>2</sub> S <sub>2</sub>                                                             | precipitate  |
| TOF MS ES <sup>-</sup> | CuKS <sub>2</sub> O <sub>8</sub>                                                           | precipitate  |
| TOF MS ES <sup>-</sup> | Cu <sub>2</sub> S <sub>2</sub> O <sub>8</sub>                                              | precipitate  |
| TOF MS ES <sup>-</sup> | C <sub>7</sub> H <sub>6</sub> Cu <sub>3</sub> K <sub>2</sub> S <sub>3</sub>                | precipitate  |
| TOF MS ES <sup>-</sup> | C <sub>6</sub> H <sub>2</sub> O <sub>5</sub> Cu <sub>3</sub> K <sub>2</sub> S <sub>1</sub> | precipitate  |

<sup>c</sup> About QB3/Chemistry Mass Spectrometry Facility <https://qb3.berkeley.edu/facility/msf/>

**Supplementary Note 1.** A simplified calculation on CH<sub>3</sub>Br and CH<sub>3</sub>Cl emissions with respect to the global agricultural usage of copper(II) sulfate.

**The amounts of copper(II) sulfate applied in global agriculture each year:** According to Global Copper Sulphate Market Report and Forecast 2021-2026<sup>d</sup>, 391.9 million tons of copper(II) sulfate (CuSO<sub>4</sub>) were produced in 2020, half of which was used as fungicide, herbicide, or pesticide in worldwide agriculture (equivalent to  $\sim 1.23 \times 10^{12}$  mol of CuSO<sub>4</sub>). Global production of CuSO<sub>4</sub> is projected to increase to 498.7 million tons by 2026.

**The relationship between copper (II) amendments and methyl halide production:** Based upon time-series sunlit experiments (Figure 3 in the main text),  $5 \times 10^{-4}$  mol (10ml, 50mM) of Cu(II) addition to 50 grams of live soil samples yielded  $1656 \pm 752$  ng CH<sub>3</sub>Br and  $1018 \pm 273$  ng CH<sub>3</sub>Cl, respectively, during the 17 days of ambient light exposure (integral of the flux-time curve), in comparison to the control samples (a.k.a., subtracting background fluxes from control studies).

**The following assumptions/approximations are made, and/or caveats exist in this extrapolation:** (1) soil samples used in this study are assumed to be representative of global agricultural soils in terms of organic matter (content, composition and structure), chloride and bromide contents and other geochemical properties which may influence the reaction to produce methyl halides; (2) the catalytic efficiency of Cu(II) on methyl halide production lasts  $\sim 17$  days, as observed in the light experiments, despite that it may last longer without the sunlight attenuation by glass jars; (3) we omitted the error in individual flux measurements for sake of clarity, as these errors are typically much smaller than the standard deviation associated with replicate incubations.

**Extrapolation:**

$$\text{CH}_3\text{Br} = 1656 \pm 752 \text{ [ng CH}_3\text{Br]} \div 0.0005 \text{ [mol Cu amended]} \times 1.23 \times 10^{12} \text{ [mol Cu pesticides yr}^{-1}\text{]} \div 10^{18} \text{ [ng Gg}^{-1}\text{]} = 4.1 \pm 1.9 \text{ [Gg CH}_3\text{Br yr}^{-1}\text{]};$$

$$\text{CH}_3\text{Cl} = 1018 \pm 273 \text{ [ng CH}_3\text{Cl]} \div 0.0005 \text{ [mol Cu amended]} \times 1.23 \times 10^{12} \text{ [mol Cu pesticides yr}^{-1}\text{]} \div 10^{18} \text{ [ng Gg}^{-1}\text{]} = 2.5 \pm 0.7 \text{ [Gg CH}_3\text{Cl yr}^{-1}\text{]}.$$

---

<sup>d</sup> Report retrieved from <https://www.expertmarketresearch.com/reports/copper-sulphate-market>

## Supplementary References

1. Comba, P., Kerscher, M., Krause, T. & Schöler, H. F. Iron-catalysed oxidation and halogenation of organic matter in nature. *Environ. Chem.* **12**, 381–395 (2015).
2. Pracht, J., Boenigk, J., Isenbeck-Schröter, M., Keppler, F. & Schöler, H. F. Abiotic Fe(III) induced mineralization of phenolic substances. *Chemosphere* **44**, 613–619 (2001).
3. Huber, S. G., Kilian, G. & Schöler, H. F. Carbon suboxide, a highly reactive intermediate from the abiotic degradation of aromatic compounds in soil. *Environ. Sci. Technol.* **41**, 7802–7806 (2007).
4. Huber, S. G., Kotte, K., Schöler, H. F. & Williams, J. Natural abiotic formation of trihalomethanes in soil: results from laboratory studies and field samples. *Environ. Sci. Technol.* **43**, 4934–4939 (2009).
5. Keppler, F., Borchers, R., Pracht, J., Rheinberger, S. & Schöler, H. F. Natural formation of vinyl chloride in the terrestrial environment. *Environ. Sci. Technol.* **36**, 2479–2483 (2002).
6. Keppler, F. *et al.* De novo formation of chloroethyne in soil. *Environ. Sci. Technol.* **40**, 130–134 (2006).
7. Keppler, F. *et al.* Formation of volatile iodinated alkanes in soil: results from laboratory studies. *Chemosphere* **52**, 477–483 (2003).
8. Fahimi, I. J., Keppler, F. & Schöler, H. F. Formation of chloroacetic acids from soil, humic acid and phenolic moieties. *Chemosphere* **52**, 513–520 (2003).
9. Althoff, F. *et al.* Abiotic methanogenesis from organosulphur compounds under ambient conditions. *Nat. Commun.* **5**, 4205 (2014).
10. Krause, T., Tubbesing, C., Benzing, K. & Schöler, H. F. Model reactions and natural occurrence of furans from hypersaline environments. *Biogeosciences* **11**, 2871–2882 (2014).
11. Huber, S. G., Wunderlich, S., Schöler, H. F. & Williams, J. Natural abiotic formation of furans in soil. *Environ. Sci. Technol.* **44**, 5799–5804 (2010).

12. M'hemdi, A., Dbira, B., Abdelhedi, R., Brillas, E. & Ammar, S. Mineralization of catechol by Fenton and photo-Fenton processes. *CLEAN – Soil Air Water* **40**, 878–885 (2012).
13. Studenroth, S., Huber, S. G., Kotte, K. & Schöler, H. F. Natural abiotic formation of oxalic acid in soils: results from aromatic model compounds and soil samples. *Environ. Sci. Technol.* **47**, 1323–1329 (2013).
14. Zazo, J. A., Casas, J. A., Mohedano, A. F., Gilarranz, M. A. & Rodríguez, J. J. Chemical pathway and kinetics of phenol oxidation by Fenton's reagent. *Environ. Sci. Technol.* **39**, 9295–9302 (2005).
15. Jiao, Y. *et al.* Global methyl halide emissions from rapeseed (*Brassica napus*) using life cycle measurements. *Geophys. Res. Lett.* **47**, e2020GL089373 (2020).
